# Supplementary material for: Magnetic anisotropy engineering in onion-structured metal oxide nanoparticles combining dual exchange coupling and proximity effects
Source: Royal Society of Chemistry journal article supplement (doi:10.1039/d3na01108a), 2024-01-01
Supplement: d3na01108a1.pdf [file d3na01108a1.pdf]

*Supplementary information for*

**Magnetic anisotropy engineering in onion-structured metal oxide nanoparticles combining dual exchanged coupling and proximity effect**

Kevin Sartori,<sup>1,2</sup> Raul Lopez-Martin,<sup>3</sup> Fadi Choueikani,<sup>2</sup> Alexandre Gloter,<sup>4</sup> Jean-Marc Grenèche,<sup>5</sup> Sylvie Begin-Colin,<sup>1</sup> Dario Taverna,<sup>6</sup> Jose A. De Toro,<sup>3</sup> Benoit P. Pichon\*,<sup>1,7</sup>

<sup>1</sup> Université de Strasbourg, CNRS, Institut de Physique et Chimie des Matériaux de Strasbourg, UMR 7504, F-67000 Strasbourg, France

<sup>2</sup> Synchrotron SOLEIL, L'Orme des Merisiers, Saint Aubin – BP48, 91192 Gif-sur-Yvette, France

<sup>3</sup> Instituto Regional de Investigación Científica Aplicada (IRICA) and Departamento de Física Aplicada, Universidad de Castilla-La Mancha, 13071 Ciudad Real, Spain

<sup>4</sup> Laboratoire de Physique des Solides, CNRS, Université Paris-Saclay, 91400 Orsay, France

<sup>5</sup> Institut des Molécules et Matériaux du Mans, IMMM, UMR CNRS-6283 Université du Maine, avenue Olivier Messiaen, 72085 Le Mans Cedex 9, France

<sup>6</sup> Institut de Minéralogie, de Physique des Matériaux et de Cosmochimie, IMPMC UMR CNRS ???, Sorbonne Université, 75005 Paris, France

<sup>7</sup> Institut Universitaire de France, 1 rue Descartes, 75231 Paris Cedex 05

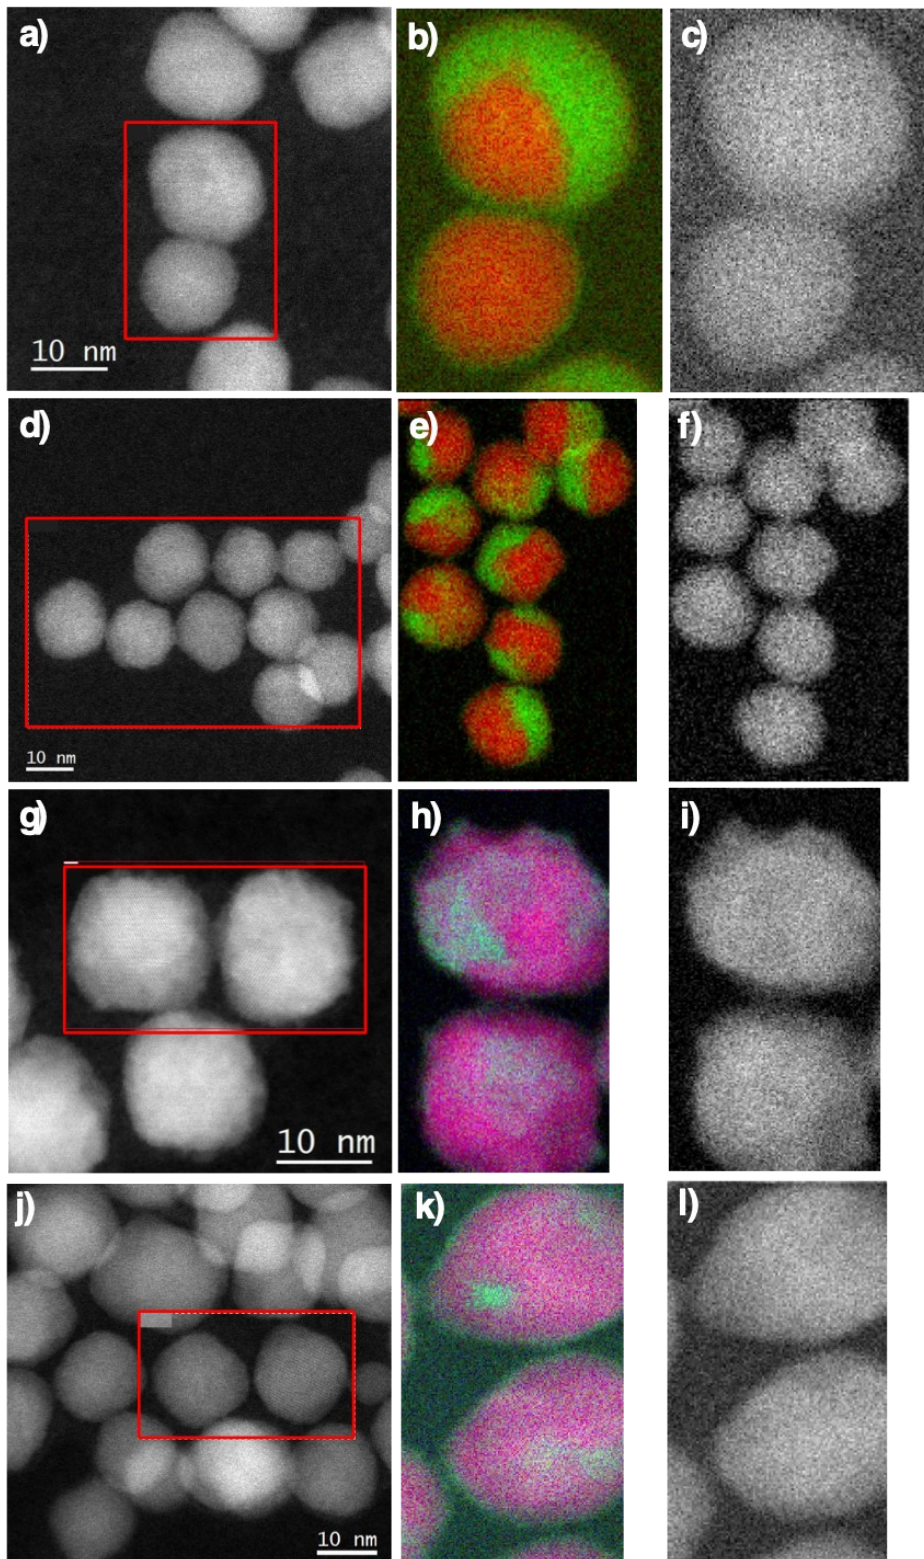

**Figure S1.** Electron loss spectroscopy spectrum imaging (EELS-SI) images corresponding to the red rectangles for a,b,c) CS, d,e,f) CSSa, g,h,i) CSSb and j,k,l) CSSc nanoparticles. b,d,h,k) Composite EELS-SI micrograph including Fe L-edge (red), Co L-edge (green) and oxygen K-edge (blue). c,f,i,l) EELS-SI micrograph at specific oxygen K-edge.

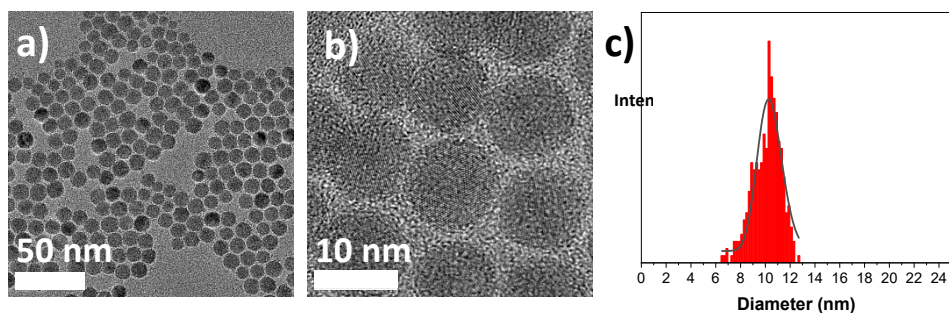

**Figure S2.** a, b) TEM micrographs of C nanoparticles and c) the corresponding size distribution.

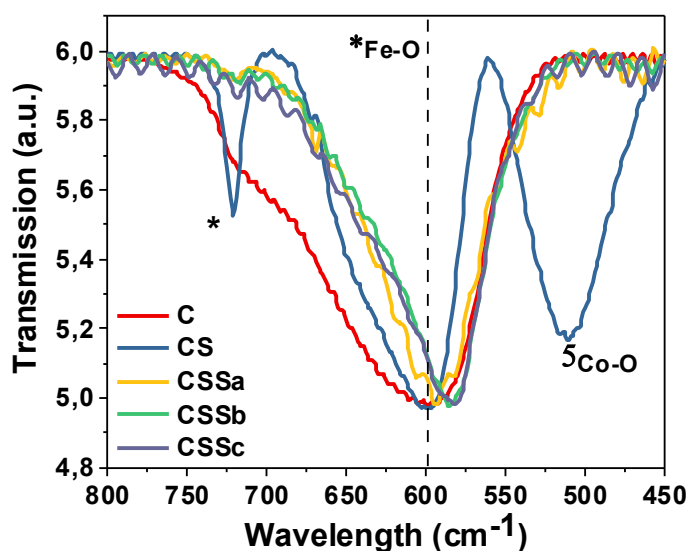

**Figure S3.** FTIR spectra of C, CS, CSSA, CSSB and CSSC nanoparticles.

**Tables S1.** Magnetic parameters measured from element specific magnetization curves recorded at 4 K by XMCD at energies corresponding to FeS1, S2, S3 and CoS4.

|      | $H_c$ (kOe) | $M_R/M_S$ S1 (%) | $M_R/M_S$ S2 (%) | $M_R/M_S$ S3 (%) | Mean of $M_R/M_S$ at Fe edges (%) | $M_R/M_S$ S4 (%) |
|------|-------------|------------------|------------------|------------------|-----------------------------------|------------------|
| CS   | 10,9        | 69               | 66               | 65               | $67 \pm 2.0$                      | 55               |
| CSSA | 10,8        | 60               | 63               | 64               | $62 \pm 2.0$                      | 59               |
| CSSB | 10,9        | 58               | 61               | 60               | $60 \pm 1.5$                      | 62               |
| CSSC | 9,6         | 60               | 64               | 62               | $62 \pm 2.0$                      | 62               |

**Table S2.** Refined values of hyperfine parameters calculated from the fit of  $^{57}\text{Fe}$  Mössbauer spectra recorded at 77 K.

| Sample      | isomer shift relative to $\alpha\text{-Fe}$ (mm/s) | Width at half height (mm/s) | quadrupole shift (mm/s) | Hyperfine field (T) | Relative subspectral area (%) | Fe species | Site occupancy |
|-------------|----------------------------------------------------|-----------------------------|-------------------------|---------------------|-------------------------------|------------|----------------|
| <b>C</b>    | 0,49                                               | 0,36                        | 0,01                    | 51,3                | 15                            | Fe3+       | Td             |
|             | 0,35                                               | 0,63                        | -0,11                   | 49,2                | 43                            | Fe3+       | Td             |
|             | 0,61                                               | 0,82                        | 0,18                    | 49                  | 35                            | Fe2-3+     | Oh             |
|             | 1,16                                               | 0,4                         | 1,9                     | 34                  | <b>4</b>                      | Fe2+       | Oh             |
|             | 0,65                                               | 0,4                         | 1,04                    | -                   | <b>3</b>                      | Fe2-3+     | Oh             |
|             | <b>0,504</b>                                       | -                           | <b>0,13</b>             | <b>47,5</b>         | -                             |            |                |
| <b>CS</b>   | 0,55                                               | 0,73                        | -0,01                   | 53,1                | 34                            | Fe3+       | Oh             |
|             | 0,49                                               | 0,37                        | 0,02                    | 50,6                | 31                            | Fe3+       | Td             |
|             | 0,55                                               | 0,81                        | 0,15                    | 47,2                | 23                            | Fe3+       | Oh             |
|             | 1,16                                               | 0,44                        | 1,88                    | 34                  | <b>6</b>                      | Fe2+       | Oh             |
|             | 0,345                                              | 0,46                        | 0,58                    | -                   | 6                             | Fe3+       | Td             |
|             | <b>0,528</b>                                       | -                           | <b>0,19</b>             | <b>48,5</b>         | -                             |            |                |
| <b>CSSa</b> | 0,53                                               | 0,54                        | -0,03                   | 53,7                | 43                            | Fe3+       | Oh             |
|             | 0,4                                                | 0,41                        | 0,02                    | 51,1                | 42                            | Fe3+       | Td             |
|             | 0,49                                               | 0,48                        | 0,03                    | 48,8                | 8                             | Fe3+       | Td             |
|             | 0,64                                               | 0,57                        | 0,49                    | 45,1                | <b>5</b>                      | Fe3-2+     | Oh             |
|             | 1,16                                               | 0,4                         | 2                       | 34,7                | <b>2</b>                      | Fe2+       | Oh             |
|             | <b>0,489</b>                                       | -                           | <b>0,06</b>             | <b>51,4</b>         | -                             |            |                |
| <b>CSSb</b> | 0,55                                               | 0,54                        | -0,05                   | 53,5                | 42                            | Fe3+       | Oh             |
|             | 0,41                                               | 0,43                        | 0,03                    | 51                  | 45                            | Fe3+       | Td             |
|             | 0,525                                              | 0,39                        | 0,12                    | 48,4                | 5                             | Fe3+       | Oh             |
|             | 0,72                                               | 0,52                        | 0,28                    | 46,5                | <b>5</b>                      | Fe3-2+     | Oh             |
|             | 1,16                                               | 0,4                         | 2,1                     | 34,7                | <b>3</b>                      | Fe2+       | Oh             |
|             | <b>0,51</b>                                        | -                           | <b>0,08</b>             | <b>51,2</b>         | -                             |            |                |
| <b>CSSc</b> | 0,51                                               | 0,53                        | -0,05                   | 53,8                | 30                            | Fe3+       | Oh             |
|             | 0,39                                               | 0,47                        | 0,01                    | 51,1                | 59                            | Fe3+       | Td             |
|             | 0,86                                               | 0,67                        | -0,29                   | 51,2                | <b>8</b>                      | Fe3-2+     | Oh             |
|             | 1,16                                               | 0,4                         | 1,8                     | 34,6                | <b>3</b>                      | Fe2+       | Oh             |
|             | <b>0,485</b>                                       | -                           | <b>0,01</b>             | <b>51,5</b>         | -                             |            |                |
